# Supplementary material
Source: publisher figshare collection journal article supplement (https://sage.figshare.com/ndownloader/files/31540138)
Supplement: Supplementary file 1 [file 31540138]

| **N** | 837 |
| --- | --- |
| **Age (median [IQR])** | 57.00 [47.00, 66.00] |
| **Sex =female (%)** | 482 (57.6) |
| **Traditional FSD (%)** | 125 (21.7) |
| **IBS (%)** | 31 (4.9) |
| **FM (%)** | 50 (7.1) |
| **CFS (%)** | 71 (10.1) |
| **IBS-pure (%)** | 11 (2.4) |
| **FM-pure (%)** | 21 (4.4) |
| **CFS-pure (%)** | 36 (7.4) |
| **BDS (%)** | 168 (22.1) |
| **Single-organ BDS (%)** | 153 (20.5) |
| **Multi-organ BDS (%)** | 14 (2.3) |
| **Symptom profiles (%)** |  |
| **No symptoms profile** | 355 (45.3) |
| **Single symptoms profiles** | 280 (44.1) |
| **Multiple symptoms profiles** | 122 (25.6) |
| **All symptoms profile*** | 27 (7.1) |
| **Cohabitation (%)** |  |
| **Missing data** | 194 (23.2) |
| **Cohabitation** | 472 (56.4) |
| **Non-cohabitation** | 171 (20.4) |
| **Vocational training (%)** |  |
| **Missing data** | 286 (34.2) |
| **Skilled worker or <1 year of vocational training** | 287 (34.3) |
| **<3 years of vocational training** | 86 (10.3) |
| **3 or 4 years of vocational training** | 132 (15.8) |
| **>4 years of vocational training** | 46 (5.5) |
| **Employment (%)** |  |
| **Missing data** | 107 (12.8) |
| **Employed** | 425 (50.8) |
| **Not employed** | 305 (36.4) |
| **Subjective Social Status (%)** |  |
| **Missing data** | 103 (12.3) |
| **Highest** | 185 (22.1) |
| **High** | 334 (39.9) |
| **Low** | 150 (17.9) |
| **Lowest** | 65 (7.8) |

**Supplementary material 3: Participants with missing data**

Supplement material for Social Position and Functional Somatic Disorders bySigne U. Schovsbo, Thomas M. Dantoft, Betina H. Thuesen, Katja B. Leth-Møller, Lene F. Eplov, Marie W. Petersen, Torben Jørgensen, Merete Osler in Scandinavian Journal of Public Health.

Participants with missing data on either exposure or outcome*

*Total n varies for the individual outcomes. A total of 837 participants had either missing data for at least one outcome or exposure.
